# Supplementary material for: The effect of storage cycle on improvement in the photovoltaic parameters of planar triple cation perovskite solar cells
Source: Royal Society of Chemistry journal article supplement (doi:10.1039/d1ma00345c), 2021-01-01
Supplement: d1ma00345c1.pdf [file d1ma00345c1.pdf]

## SUPPORTING INFORMATION

### Effect of storage cycle on improvement in photovoltaic parameters of planar triple cation perovskite solar cells

Vera La Ferrara\*, Antonella De Maria, Gabriella Rametta and Paola Delli Veneri

Italian National Agency for New Technologies, Energy and Sustainable Economic Development (ENEA) – Portici Research Center, Piazzale E. Fermi, 80055 Portici (Na), Italy

Corresponding author: Vera La Ferrara, tel. +39 -081-7723322, email: vera.laferrara@enea.it

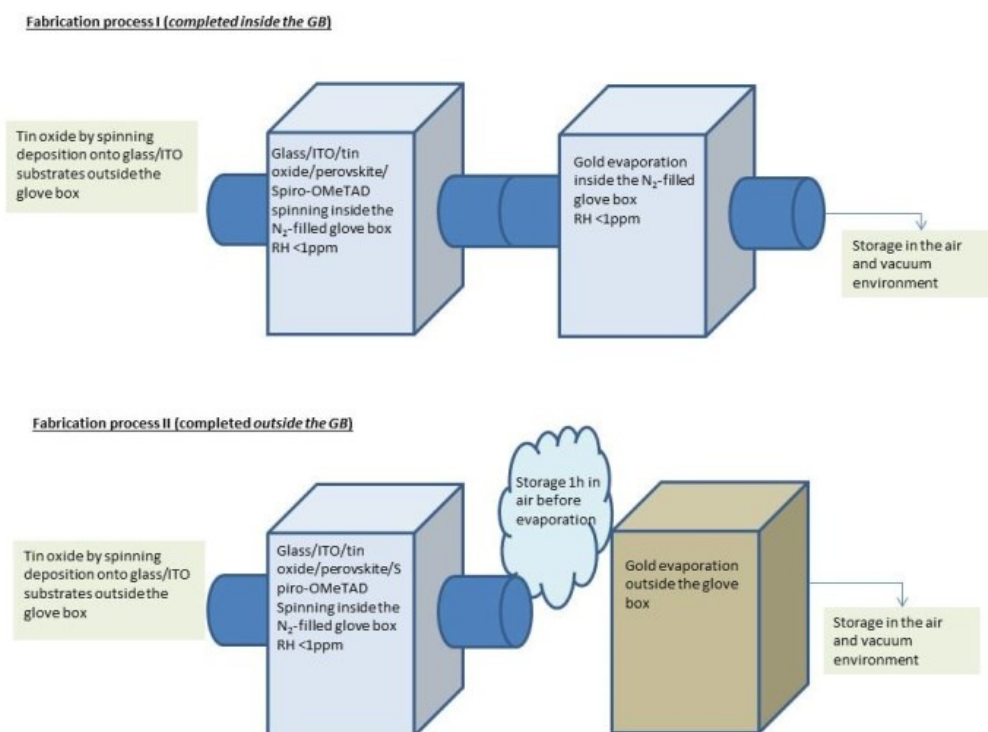

**Fig. S1** schematic diagram of the two different fabrication procedures of PSCs: fabrication process I and II. After SnO<sub>2</sub> deposition in humid air onto glass/ITO, substrates were inserted in N<sub>2</sub>-filled glove box, with RH < 1ppm and perovskite and HTM are deposited by spinning onto glass/ITO/SnO<sub>2</sub>. The former batch (a) was inserted into another N<sub>2</sub>-filled glove box, with a thermal evaporator for Au electrical contact deposition (*devices completed inside the GB*). The latter (b) was transferred outside the glove box using an evaporator in another laboratory (*devices completed outside the GB*). The time in air, between the time from transferring and loading in another evaporator, is about 1h. All the devices were stored in humid air, RH = (30 ± 10) %, and finally placed in low vacuum chamber.

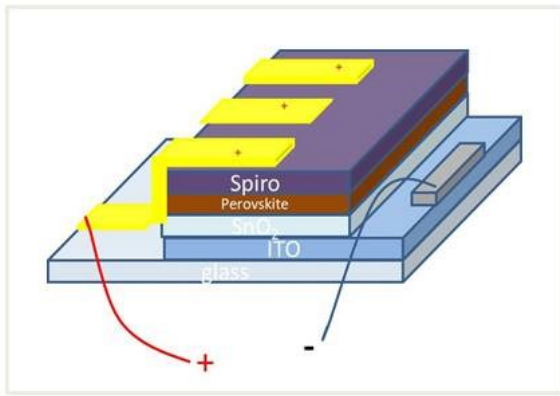

(a)

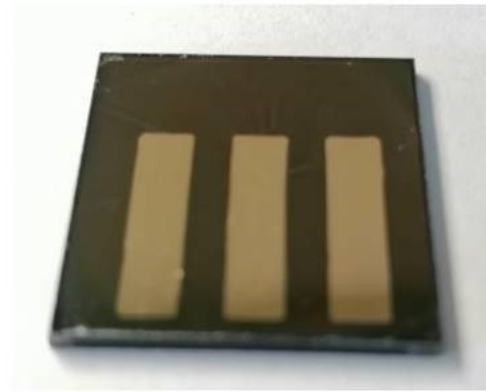

(b)

**Fig. S2:** (a) architecture of single-junction perovskite solar cell; (b) photograph of typical perovskite solar cell, 2 x 2 cm<sup>2</sup> with gold contacts before silver deposition on ITO. Active area is 0.11 cm<sup>2</sup>

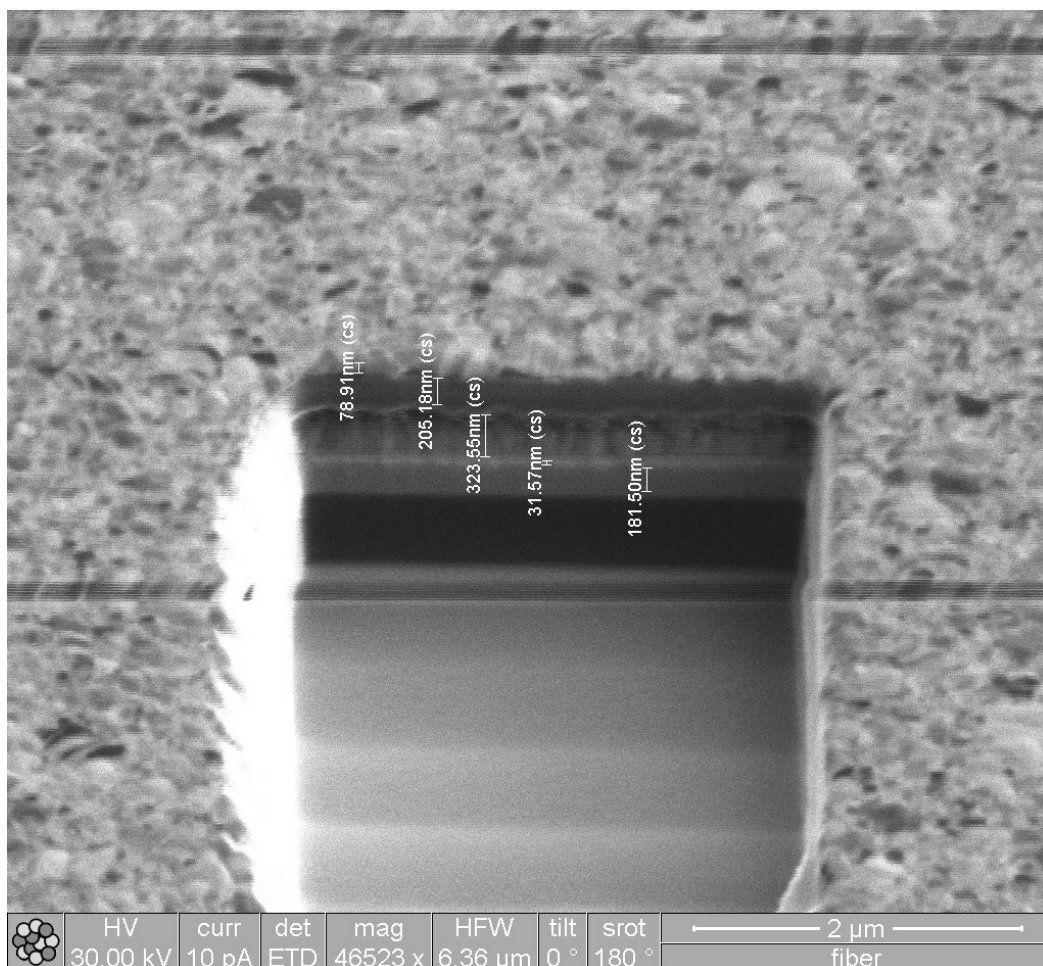

**Fig. S3:** Ion image of FIB cross section of a typical device with values of layer thickness measured by software of Quanta 200 3D

**Table S1** Summary of efficiency of PSCs respect to ambient fabrication or storage conditions in function of perovskite chemical composition, thickness and architecture (\*capping layer)

| Perovskite                                                                                                                         | Thickness (nm) | Architecture                                                                    | Fabrication or storage condition        | PCE (%)      | Ref.                      |
|------------------------------------------------------------------------------------------------------------------------------------|----------------|---------------------------------------------------------------------------------|-----------------------------------------|--------------|---------------------------|
| MAPI                                                                                                                               | ~ 400          | ITO/Planar SnO <sub>2</sub> /C60-SAM/perovskite/Spiro-OMeTAD/Au                 | under atmospheric conditions (RH=50%)   | 18.7         | Ugur et al. 2020 [11]     |
| (FAPbI <sub>3</sub> ) <sub>0.85</sub> (MAPbBr <sub>3</sub> ) <sub>0.15</sub>                                                       | ~ 400*         | FTO/compact TiO <sub>2</sub> /mesoTiO <sub>2</sub> /perovskite/Spiro-OMeTAD/Au  | Ambient RH=(20± 10)%                    | 20.4         | Cho et al 2021 [46]       |
| Cs <sub>0.05</sub> (MA <sub>0.17</sub> FA <sub>0.83</sub> ) <sub>0.95</sub> Pb(I <sub>0.83</sub> Br <sub>0.17</sub> ) <sub>3</sub> | not reported   | FTO/compact TiO <sub>2</sub> /meso TiO <sub>2</sub> /perovskite/Spiro-OMeTAD/Au | Ambient moderate humidity (RH=40%)      | 14.8         | Mesquita et al. 2020 [9]  |
| (FAPbI <sub>3</sub> ) <sub>0.97</sub> (MAPbBr <sub>3</sub> ) <sub>0.03</sub>                                                       | 760<br>650     | ITO/SnO <sub>2</sub> / perovskite/Spiro-OMeTAD/Au                               | Ambient air (RH=30/40%)                 | 19.9<br>20.9 | Jiang et al 2017 [69, 75] |
| C <sub>2</sub> H <sub>5</sub> PbI <sub>3</sub>                                                                                     | ~170           | FTO/SnO <sub>2</sub> /perovskite/Spiro-OMeTAD/Au                                | Ambient air (RH =20/30%)                | 17.38        | Zhang et al 2020 [16]     |
| Cs <sub>0.05</sub> FA <sub>0.8</sub> MA <sub>0.15</sub> PbI <sub>2.5</sub> Br <sub>0.5</sub>                                       | 320            | ITO/SnO <sub>2</sub> / perovskite/Spiro-OMeTAD/Au                               | Ambient air (RH=30± 10)% and low vacuum | 20.9         | This work                 |

**Table S2:** Average and best parameters of devices completed outside the GB over storage time in humid air/low vacuum environment cycle

| Time (h)                |                 | V <sub>oc</sub> (mV) | J <sub>sc</sub> (mA/cm <sup>2</sup> ) | FF (%)      | PCE (%)     |
|-------------------------|-----------------|----------------------|---------------------------------------|-------------|-------------|
| 0                       | <i>Average</i>  | 916 ± 5              | 23.6 ± 0.1                            | 55.3 ± 0.9  | 12.0 ± 0.3  |
|                         | <i>Champion</i> | 922                  | 23.70                                 | 56.3        | 12.2        |
| 72 (humid air storage)  | <i>Average</i>  | 1013 ± 12            | 22.9 ± 0.2                            | 72.8 ± 2.9  | 17.0 ± 1.0  |
|                         | <i>Champion</i> | 1017                 | 22.86                                 | 74.8        | 17.4        |
| 312 (humid air storage) | <i>Average</i>  | 1064 ± 16            | 21.4 ± 0.1                            | 72.5 ± 2.6  | 16.5 ± 0.9  |
|                         | <i>Champion</i> | <b>1083</b>          | <b>21.76</b>                          | <b>74.1</b> | <b>17.5</b> |
| 720 (vacuum storage)    | <i>Average</i>  | 1068 ± 12            | 23.4 ± 0.6                            | 74.8 ± 5.6  | 18.7 ± 2.1  |
|                         | <i>Champion</i> | <b>1083</b>          | <b>24.72</b>                          | <b>73.6</b> | <b>19.7</b> |

**Table S3:** Average and best parameters of *completed inside the GB* devices over storage time in humid air/low vacuum environment cycle

| Time (h)                          |                 | $V_{oc}$ (mV) | $J_{sc}$ (mA/cm <sup>2</sup> ) | FF (%)      | PCE (%)     |
|-----------------------------------|-----------------|---------------|--------------------------------|-------------|-------------|
| <b>0</b>                          | <i>Average</i>  | 977 ± 30      | 21.5 ± 0.9                     | 61.4 ± 3.8  | 12.7 ± 1.6  |
|                                   | <i>Champion</i> | 975           | 22.1                           | 61.4        | 13.2        |
| <b>72</b><br>(humid air storage)  | <i>Average</i>  | 1104 ± 16     | 23.4 ± 0.8                     | 77.3 ± 3.6  | 19.9 ± 1.9  |
|                                   | <i>Champion</i> | <b>1080</b>   | <b>23.58</b>                   | <b>81.6</b> | <b>20.8</b> |
| <b>312</b><br>(humid air storage) | <i>Average</i>  | 1086 ± 25     | 21.1 ± 0.8                     | 76.1 ± 4.8  | 17.4 ± 2.2  |
|                                   | <i>Champion</i> | 1074          | 21.40                          | 81.6        | 18.8        |
| <b>720</b><br>(vacuum storage)    | <i>Average</i>  | 1110±30       | 23.6 ± 0.4                     | 76.0 ± 3.4  | 19.9 ± 1.8  |
|                                   | <i>Champion</i> | <b>1121</b>   | <b>24.07</b>                   | <b>77.3</b> | <b>20.9</b> |

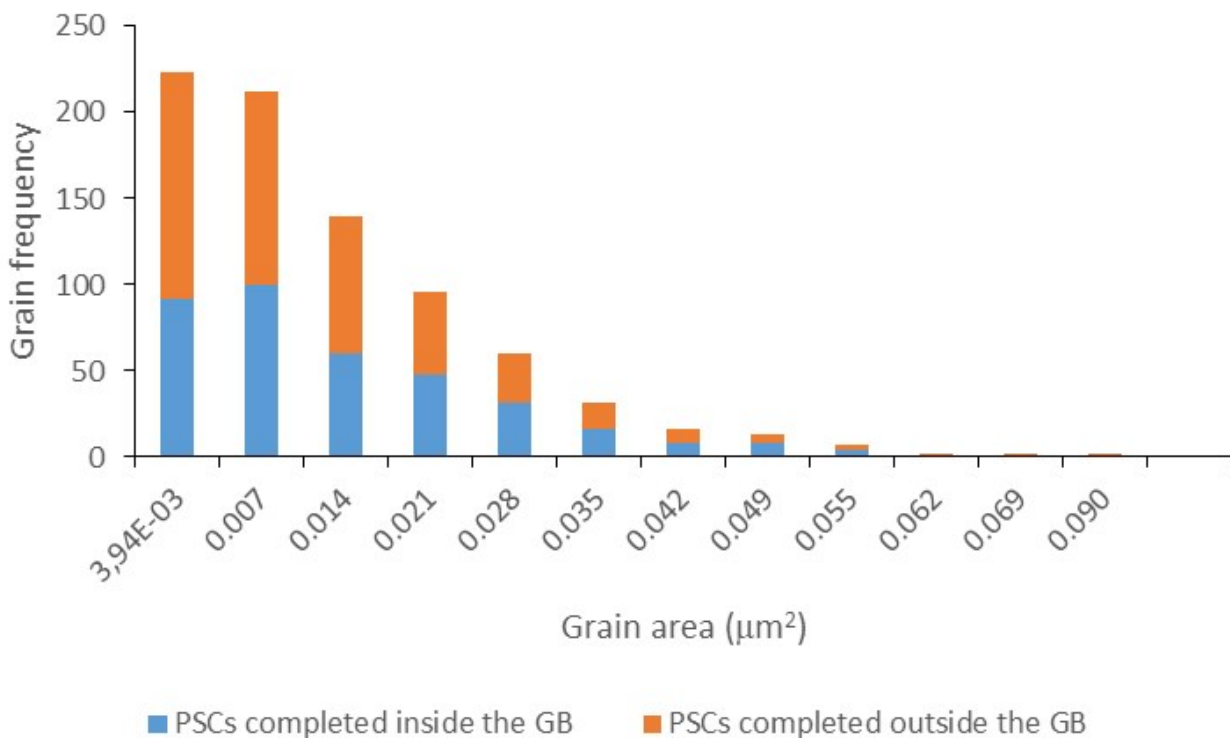

Fig. S4: distribution of grain area of devices completed inside (blue) and outside (orange) the GB . PSCs completed outside show a larger grain population of small area respect to area size of grains of devices completed inside the GB

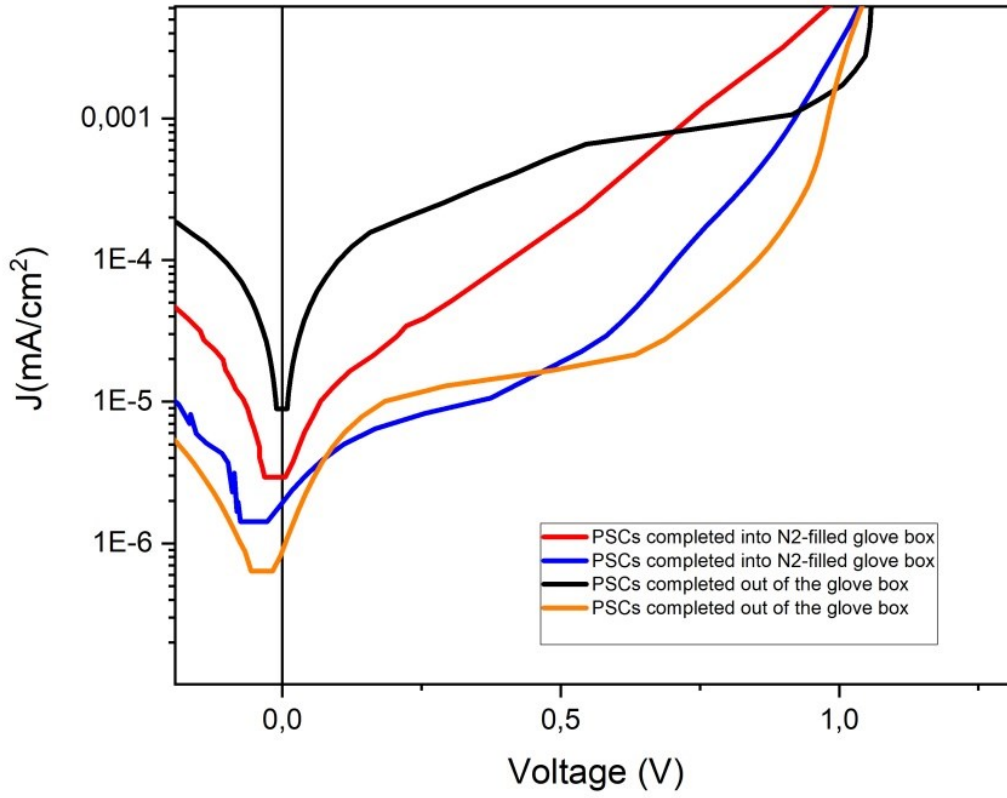

Fig. S5: dark J-V of different stored devices after 720 h from fabrication day

**Table S4:**  $N_t$  calculated from equation (1)

|                                  | $N_t$ ( $cm^{-3}$ )  |
|----------------------------------|----------------------|
| Devices completed inside the GB  | $0,9 \times 10^{16}$ |
|                                  | $0,4 \times 10^{16}$ |
| Devices completed outside the GB | $1,9 \times 10^{16}$ |
|                                  | $1,6 \times 10^{16}$ |

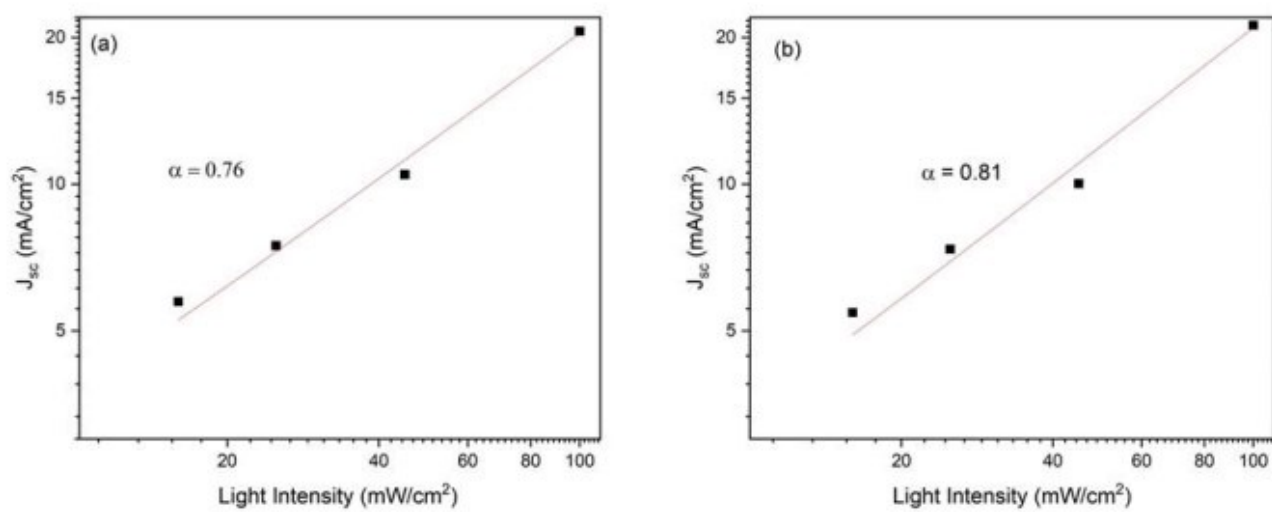

Fig. S6: Intensity-dependent  $J_{sc}$  for device (a) completed outside and (b) inside G
